# Supplementary material for: Deconvolution of intermixed redox processes in Ni-based cation-disordered Li-excess cathodes
Source: Royal Society of Chemistry journal article supplement (doi:10.1039/d0ee03526b), 2021-01-01
Supplement: d0ee03526b1.pdf [file d0ee03526b1.pdf]

## Electronic Supplementary Information

# Deconvolution of Intermixed Redox Processes in Ni-based Cation-Disordered Li-Excess Cathodes

Tzu-Yang Huang<sup>1, 2</sup>, Matthew J. Crafton<sup>1, 2</sup>, Yuan Yue<sup>2</sup>, Wei Tong<sup>2</sup>, and  
Bryan D. McCloskey<sup>1, 2, \*</sup>

<sup>1</sup>*Department of Chemical and Biomolecular Engineering, University of California–Berkeley, Berkeley, California 94720, United States*

<sup>2</sup>*Energy Storage and Distributed Resources Division, Lawrence Berkeley National Laboratory, Berkeley, California 94720, United States*

\*Correspondence: [bmcclosk@berkeley.edu](mailto:bmcclosk@berkeley.edu)

## Note S1. Isotopic Enrichment

A known amount of  $\text{Li}_{1.15}\text{Ni}_{0.45}\text{Ti}_{0.3}\text{Mo}_{0.1}\text{O}_{1.85}\text{F}_{0.15}$  (NTMF) powder was weighed (243.2 mg) on a 2 mL combustion boat (VWR) and placed in a Lindberg Blue Mini Mite Tube Furnace (Thermo Scientific). The tube (Alumina, 20" length, 1" OD, Coorstek) was sealed using Swagelok Ultra-Torr fittings that allow connection to 20 cm stainless-steel capillaries (1/16" OD, VICI). The capillaries allow the tube to be connected to various attachments: 1) an expandable membrane (airtight heat-sealable aluminum pouch) that allows heated gas volume expansion; 2) a closed  $^{18}\text{O}_2$  gas tank (97 at%, Sigma Aldrich) that controls the dosage of  $^{18}\text{O}_2$ . In addition, a cleaned,  $\text{N}_2$ -purged, and emptied 1 mL gas sample loop (1/16" OD stainless-steel capillary, VICI) under static vacuum was attached to the furnace through a closed valve, which could be toggled on and off to extract headspace gas at the end of the enrichment process. The tube furnace with all fittings was leak-tested and purged with  $\text{N}_2$  for  $\geq 3$  hours. A known volume (15 mL, 1 atm, room temperature) of  $^{18}\text{O}_2$  was introduced into the furnace while the closed system was allowed to equilibrate at the recorded ambient temperature and pressure (1 atm). The enclosed samples were heated to 600 °C for 6 hours to induce isotopic exchange. After cooling and headspace gas sampling, the  $^{18}\text{O}$ -enriched powder was transferred to an Ar-filled glove box with minimized exposure to the ambient ( $< 5$  min) to avoid substantial change in surface native carbonate (NACN) content. To acquire isotopic enrichment level in the NTMF lattice, an oxygen balance on  $^{18}\text{O}$  was performed by comparing the closed system before (denoted by prime symbol, natural abundance of  $^{18}\text{O}$  is 0.2%) and after isotopic exchange, where  $n_i$  and  $\rho_i$  represents the molar amount and  $^{18}\text{O}$  isotopic fraction of species  $i$ , respectively:

$$\begin{aligned} 2 \times n'_{\text{O}_2} \times 97\% + 1.85 \times n'_{\text{NTMF}} \times 0.2\% + 3 \times n'_{\text{NACN}} \times 0.2\% \\ = 2 \times n_{\text{O}_2} \times \rho_{\text{O}_2} + 2 \times n_{\text{CO}_2} \times \rho_{\text{CO}_2} + 1.85 \times n_{\text{NTMF}} \times \rho_{\text{NTMF}} + 3 \times n_{\text{NACN}} \times \rho_{\text{NACN}} \end{aligned} \quad (\text{S.1})$$

With the assumption that the net amount of headspace  $\text{O}_2$  remains constant before and after isotopic exchange ( $n'_{\text{O}_2} = n_{\text{O}_2}$ ), mass-spectrometry analysis on the sampled headspace gas allows quantification of  $\rho_{\text{O}_2}$ ,  $\rho_{\text{CO}_2}$ , and  $n_{\text{CO}_2}/n_{\text{O}_2}$ . The  $^{18}\text{O}$ -enriched powder was titrated by 10 M  $\text{H}_2\text{SO}_4$  to measure  $n_{\text{NACN}}$  and  $\rho_{\text{NACN}}$ , as shown in Table S1. Notice that  $n'_{\text{NACN}} \approx n_{\text{CO}_2} + n_{\text{NACN}}$  and  $\rho_{\text{CO}_2} \approx \rho_{\text{NACN}}$ , which suggests that solid NACN and headspace  $\text{CO}_2$  almost reach equilibrium between thermal decomposition and re-deposition during the isotopic exchange process. On the whole, substituting all measurable variables in Equation (S.1) for known quantities determines  $\rho_{\text{NTMF}}$ , namely the bulk mean  $^{18}\text{O}$  enrichment in NTMF lattice.

Table S1. Isotopic Distribution of Native Carbonate (NACN)

| Carbonate <sup>b</sup><br>( $\mu\text{mol g}^{-1}$ ) | Titration <sup>a</sup> : $\text{C}^*\text{O}_3^{2-} + \text{H}^+ \longrightarrow \text{C}^*\text{O}_2 \uparrow + \text{H}_2^*\text{O}$ |                              |                              | Enrichment<br>$^{18}\text{O}$ (%) |
|------------------------------------------------------|----------------------------------------------------------------------------------------------------------------------------------------|------------------------------|------------------------------|-----------------------------------|
|                                                      | Distribution (%)                                                                                                                       |                              |                              |                                   |
|                                                      | $\text{C}^{16,16}\text{O}_2$                                                                                                           | $\text{C}^{16,18}\text{O}_2$ | $\text{C}^{18,18}\text{O}_2$ |                                   |
| 34.6                                                 | 37.8                                                                                                                                   | 44.6                         | 17.6                         | 39.9                              |

<sup>a</sup> Star symbols denote partial  $^{18}\text{O}$  enrichment;

<sup>b</sup> Amount normalized to the net weight of NTMF powder.

Table S2. Isotopic Distribution of *in-situ* CO<sub>2</sub> Outgassing

| Cut-off Voltage (V) | CO <sub>2</sub> source | Amount <sup>a</sup> (mmol mol <sup>-1</sup> ) | Distribution (%)                  |                                   |                                   | Enrichment <sup>18</sup> O (%) |
|---------------------|------------------------|-----------------------------------------------|-----------------------------------|-----------------------------------|-----------------------------------|--------------------------------|
|                     |                        |                                               | C <sup>16,16</sup> O <sub>2</sub> | C <sup>16,18</sup> O <sub>2</sub> | C <sup>18,18</sup> O <sub>2</sub> |                                |
| 3.0 <sup>b</sup>    | NACN                   | < 0.1                                         | n/a                               | n/a                               | n/a                               | n/a                            |
|                     | Elyte                  | < 0.1                                         | n/a                               | n/a                               | n/a                               | n/a                            |
| 3.9                 | NACN                   | < 0.1                                         | n/a                               | n/a                               | n/a                               | n/a                            |
|                     | Elyte                  | < 0.1                                         | n/a                               | n/a                               | n/a                               | n/a                            |
| 4.0                 | NACN                   | < 0.1                                         | n/a                               | n/a                               | n/a                               | n/a                            |
|                     | Elyte                  | 0.3                                           | 100.0                             | < 0.1                             | 0.0                               | < 0.1                          |
| 4.1                 | NACN                   | < 0.1                                         | n/a                               | n/a                               | n/a                               | n/a                            |
|                     | Elyte                  | 0.4                                           | 90.7                              | 9.3                               | 0.0                               | 4.7                            |
| 4.4                 | NACN                   | 0.2                                           | 37.8                              | 44.6                              | 17.6                              | 39.9                           |
|                     | Elyte                  | 1.0                                           | 77.9                              | 22.1                              | 0.0                               | 11.0                           |
| 4.5                 | NACN                   | 0.5                                           | 37.8                              | 44.6                              | 17.6                              | 39.9                           |
|                     | Elyte                  | 1.4                                           | 71.9                              | 28.1                              | 0.0                               | 14.0                           |
| 4.6                 | NACN                   | 0.5                                           | 37.8                              | 44.6                              | 17.6                              | 39.9                           |
|                     | Elyte                  | 1.7                                           | 84.9                              | 15.1                              | 0.0                               | 7.5                            |
| 4.7                 | NACN                   | 0.6                                           | 37.8                              | 44.6                              | 17.6                              | 39.9                           |
|                     | Elyte                  | 4.9                                           | 86.9                              | 13.1                              | 0.0                               | 6.5                            |
| 4.8                 | NACN                   | 1.0                                           | 37.8                              | 44.6                              | 17.6                              | 39.9                           |
|                     | Elyte                  | 7.1                                           | 86.6                              | 13.4                              | 0.0                               | 6.7                            |

<sup>a</sup> Amount normalized to the net mole of active material, NTMF;

<sup>b</sup> Uncharged cathode is displayed at the average OCV.

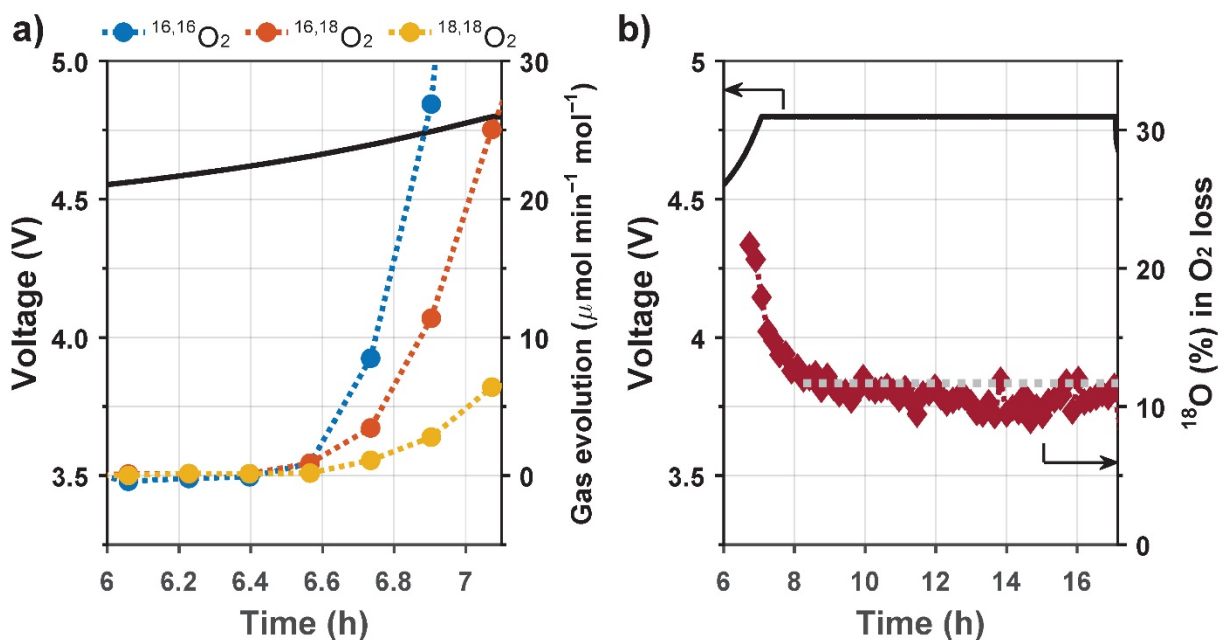

Figure S1. *In-situ*  $\text{O}_2$  loss (DEMS) for NTMF charged to 4.8 V (vs.  $\text{Li}/\text{Li}^+$ ). (a) Onset of  $\text{O}_2$  evolution along the voltage profile (black line), indicating almost identical onset potential and electrochemical origin for the three isotopic  $\text{O}_2$  species. (b)  $^{18}\text{O}$  enrichment of  $\text{O}_2$  (red solid markers) in the sampled headspace gas at each instant after  $\text{O}_2$  onset. Gray horizontal dotted line denotes the lattice bulk mean value. Initial higher gaseous  $^{18}\text{O}$  enrichment than the solid-state bulk mean value implies that  $\text{O}_2$  loss begins from the NTMF crystal surface, where gradient  $^{18}\text{O}$  enrichment is expected.

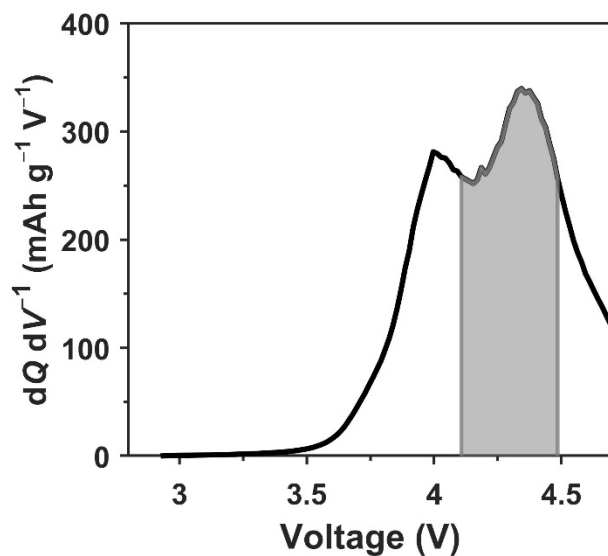

Figure S2. First-charge differential capacity analysis ( $dQ dV^{-1}$ ) for NTMF tested at the constant current rate of  $0.1 \text{ Li}^+ \text{ h}^{-1}$  without voltage hold. The enclosed area of the gray-shaded region equals the net electron transfer measured by the potentiostat at the voltage range between 4.1 V and 4.5 V.

## Note S2. Disproportionation of Various Lattice Oxidized Oxygen Species

While we display  $O^-$  as the lattice oxidized oxygen in Equation (1) and Figure 3, the possible existence of other oxidized oxygen species, such as superoxide ( $O_2^-$ ), cannot be ruled out. Here we simplify the charge compensation, during the electrochemical operation, fulfilled by lattice oxygen as the following equation, where  $0 \leq \omega < 2$  and  $2(2 - \omega)$  electrons in the lattice are ultimately delivered to the external circuit due to lattice-delithiation (remove  $Li^+$  from the lattice) coupled with lattice-electroneutrality:

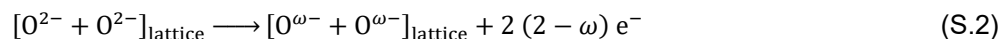

In the strong acid environment, namely 10 M  $H_2SO_4$  titration, we posit that the dissolved oxidized oxygen species from NTMF lattice preferentially dimerize due to a close frontier-orbital energy and symmetry match, followed by the disproportionation reaction:

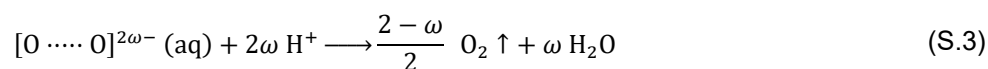

With each gaseous  $O_2$  arising from disproportionation reactions, measured by TiMS, we can backcalate O-redox capacity of  $4 e^-$  by adopting the stoichiometric coefficients in both Equation (S.2) and Equation (S.3) ( $2(2 - \omega) / (\frac{2 - \omega}{2}) = 4$ ), which is independent of formal oxidation state of lattice oxidized oxygen species. This analysis suggests that the acid titration technique developed in this work is generalizable to quantify O-redox capacity contributed by a wide variety of lattice oxidized oxygen species.

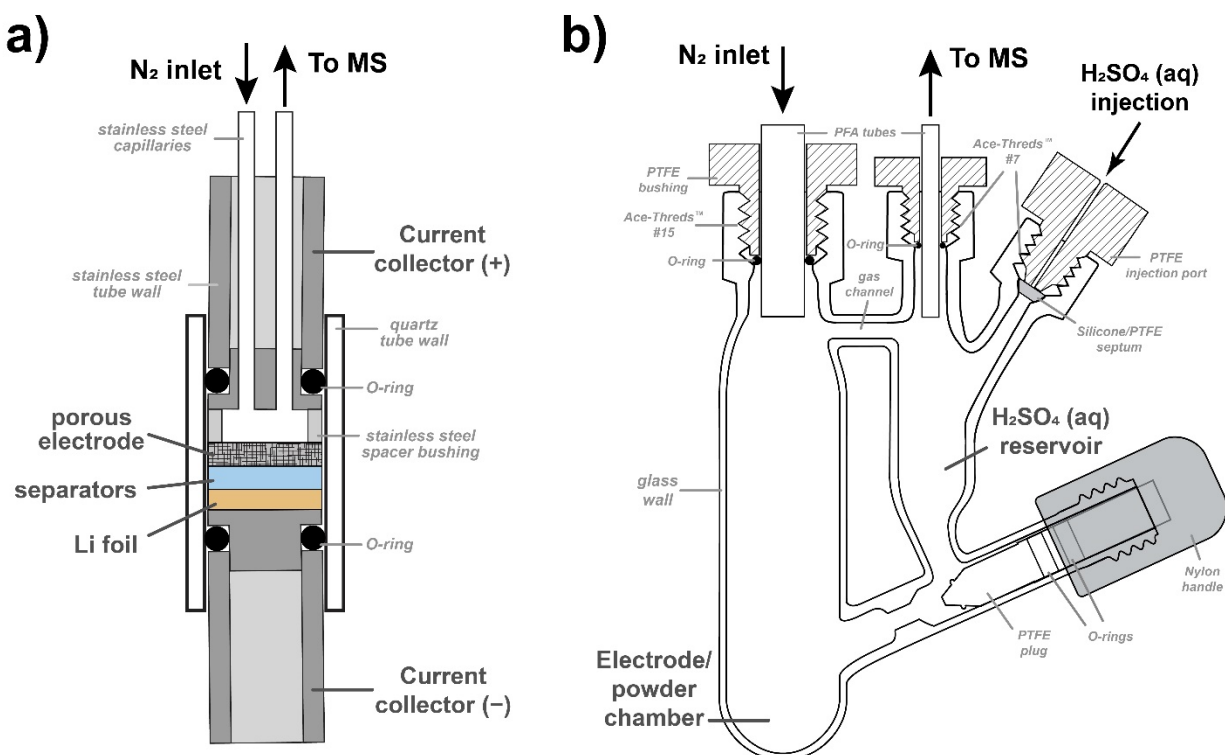

Figure S3. Cell configuration schematics. (a) Electrochemical cell<sup>1,2</sup> with the center quartz tubular section wrapped by a Swagelok perfluoroalkoxy (PFA) union fitting. (b) Titration glass cell, on which the upper ends of PFA tubes are fastened by Valco column end fittings that allow connection to either a carrier gas supply system or the mass-spectrometer gas sample transfer line. The entire setup was leak-tested before each electrochemical measurement or titration experiment.

### Note S3. Decoupling mixed O<sub>2</sub> release by TiMS

A mixture of <sup>18</sup>O tagged and untagged O<sub>2</sub> evolves when an extracted charged cathode is titrated with 10 M H<sub>2</sub>SO<sub>4</sub>. The molar amount of O<sub>2</sub> released from the disproportionation reaction (Equation (1)) is denoted by  $m_1$  and can be calculated from the following equation, where  $n_i$  and  $\rho_i$  represents the molar amount and <sup>18</sup>O isotopic fraction of species  $i$ , respectively:

$$m_1 = \frac{n_{16,18}\text{O}_2 + 2 n_{18,18}\text{O}_2}{2 \rho_{\text{NTMF}}} \quad (\text{S.4})$$

Water oxidation (Equation (2)) emitting  $m_2$  of O<sub>2</sub> can be quantified accordingly:

$$m_2 = n_{16,16}\text{O}_2 - (m_1 - n_{16,18}\text{O}_2 - n_{18,18}\text{O}_2) \quad (\text{S.5})$$

The values of  $m_1$  and  $m_2$  for titrated cathodes at various cut-off voltages are summarized in Table S3 for comparison.

Table S3. Decoupled O<sub>2</sub> Release During Acid Titration

| Cut-off Voltages <sup>a</sup> (V) | Net O <sub>2</sub> (mmol mol <sup>-1</sup> ) <sup>b</sup> | Distribution (%)                |                                 |                                 | O <sub>2</sub> <sup>c</sup> $m_2$ | O <sub>2</sub> <sup>d</sup> $m_1$ |
|-----------------------------------|-----------------------------------------------------------|---------------------------------|---------------------------------|---------------------------------|-----------------------------------|-----------------------------------|
|                                   |                                                           | <sup>16,16</sup> O <sub>2</sub> | <sup>16,18</sup> O <sub>2</sub> | <sup>18,18</sup> O <sub>2</sub> |                                   |                                   |
| 3.0 <sup>e</sup>                  | < 0.1                                                     | n/a                             | n/a                             | n/a                             | < 0.1                             | < 0.1                             |
| 3.9                               | 17.4                                                      | 98.6                            | 0.7                             | 0.7                             | 15.9                              | 1.5                               |
| 4.0                               | 36.9                                                      | 98.7                            | 1.0                             | 0.3                             | 34.3                              | 2.7                               |
| 4.1                               | 61.8                                                      | 98.8                            | 1.0                             | 0.2                             | 58.3                              | 3.5                               |
| 4.5                               | 166.9                                                     | 94.6                            | 4.4                             | 1.0                             | 121.7                             | 45.2                              |
| 4.7                               | 183.0                                                     | 94.5                            | 4.8                             | 0.7                             | 133.9                             | 49.2                              |

<sup>a</sup> Cut-off voltage of each extracted cathode;

<sup>b</sup> Amount normalized to the net mole of active material, NTMF;

<sup>c</sup> Equation (2) and Equation (S.5);

<sup>d</sup> Equation (1) and Equation (S.4);

<sup>e</sup> Uncharged cathode is displayed at the average OCV.

Table S4. Effect of Charge Current on 4.5 V-Cathodes

| Charge Rates <sup>a</sup><br>(Li <sup>+</sup> h <sup>-1</sup> ) | Net O <sub>2</sub><br>(mmol mol <sup>-1</sup> ) <sup>b</sup> | Distribution (%)                |                                 |                                 | O <sub>2</sub> <sup>c</sup><br><i>m</i> <sub>2</sub> | O <sub>2</sub> <sup>d</sup><br><i>m</i> <sub>1</sub> |
|-----------------------------------------------------------------|--------------------------------------------------------------|---------------------------------|---------------------------------|---------------------------------|------------------------------------------------------|------------------------------------------------------|
|                                                                 |                                                              | <sup>16,16</sup> O <sub>2</sub> | <sup>16,18</sup> O <sub>2</sub> | <sup>18,18</sup> O <sub>2</sub> |                                                      |                                                      |
| 0.05                                                            | 163.4                                                        | 95.4                            | 3.6                             | 1.0                             | 122.4                                                | 41.0                                                 |
| 0.1                                                             | 166.9                                                        | 94.6                            | 4.4                             | 1.0                             | 121.7                                                | 45.2                                                 |
| 0.5                                                             | 165.4                                                        | 95.3                            | 3.7                             | 1.0                             | 124.1                                                | 41.2                                                 |

<sup>a</sup> After the constant-rate charge to 4.5 V, cathodes underwent a voltage hold until the current dropped below an equivalent threshold 0.01 Li<sup>+</sup> h<sup>-1</sup> (2.95 mA g<sup>-1</sup>);

<sup>b</sup> Amount normalized to the net mole of active material, NTMF;

<sup>c</sup> Equation (2) and Equation (S.5);

<sup>d</sup> Equation (1) and Equation (S.4);

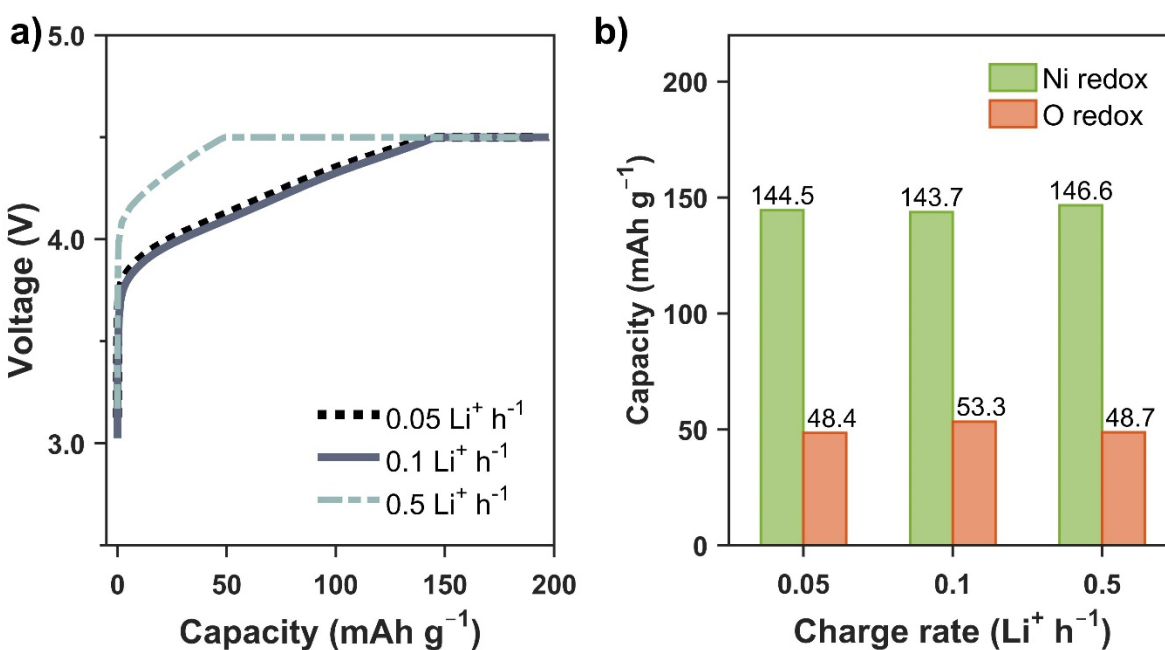

Figure S4. Effect of charge current on the relative contribution of redox processes. (a) Voltage profiles of <sup>18</sup>O-enriched NTMF electrodes during constant-rate charges, ranging from 0.05 Li<sup>+</sup> h<sup>-1</sup> (14.8 mA g<sup>-1</sup>) to 0.5 Li<sup>+</sup> h<sup>-1</sup> (148 mA g<sup>-1</sup>), followed by a voltage hold at 4.5 V vs. Li/Li<sup>+</sup> until the current dropped below the same threshold 0.01 Li<sup>+</sup> h<sup>-1</sup> (2.95 mA g<sup>-1</sup>). (b) Deconvoluted capacities of Ni redox (green bar) and oxygen redox (orange bar) quantified by TiMS, suggesting almost identical relative contribution of each individual redox processes even though the electrodes experience various amount of time at a cut-off voltage of 4.5 V.

### Note S4. Pourbaix Diagrams

To understand the instability of NTMF immersed in acidic aqueous solutions, we analyze the solid-aqueous equilibria<sup>3</sup> of selected model metal-oxide materials that have transition-metal ions (TM) with: 1) similar oxidation states as TM in delithiated NTMF; 2) octahedral coordination in rocksalt-like lattices. All Pourbaix diagrams were generated through open-source Python Materials Genomics (pymatgen)<sup>4</sup> packages, which adopt a formalism<sup>5</sup> combining *ab initio* calculated solid-state energies (acquired by accessing the Materials Project<sup>6</sup> database) with experimentally tabulated aqueous-state free energies to predict solid-aqueous equilibria. Notice that the Materials Project database is actively updated so the converged energy values and the Pourbaix diagrams presented in this work may be subject to slight variation.

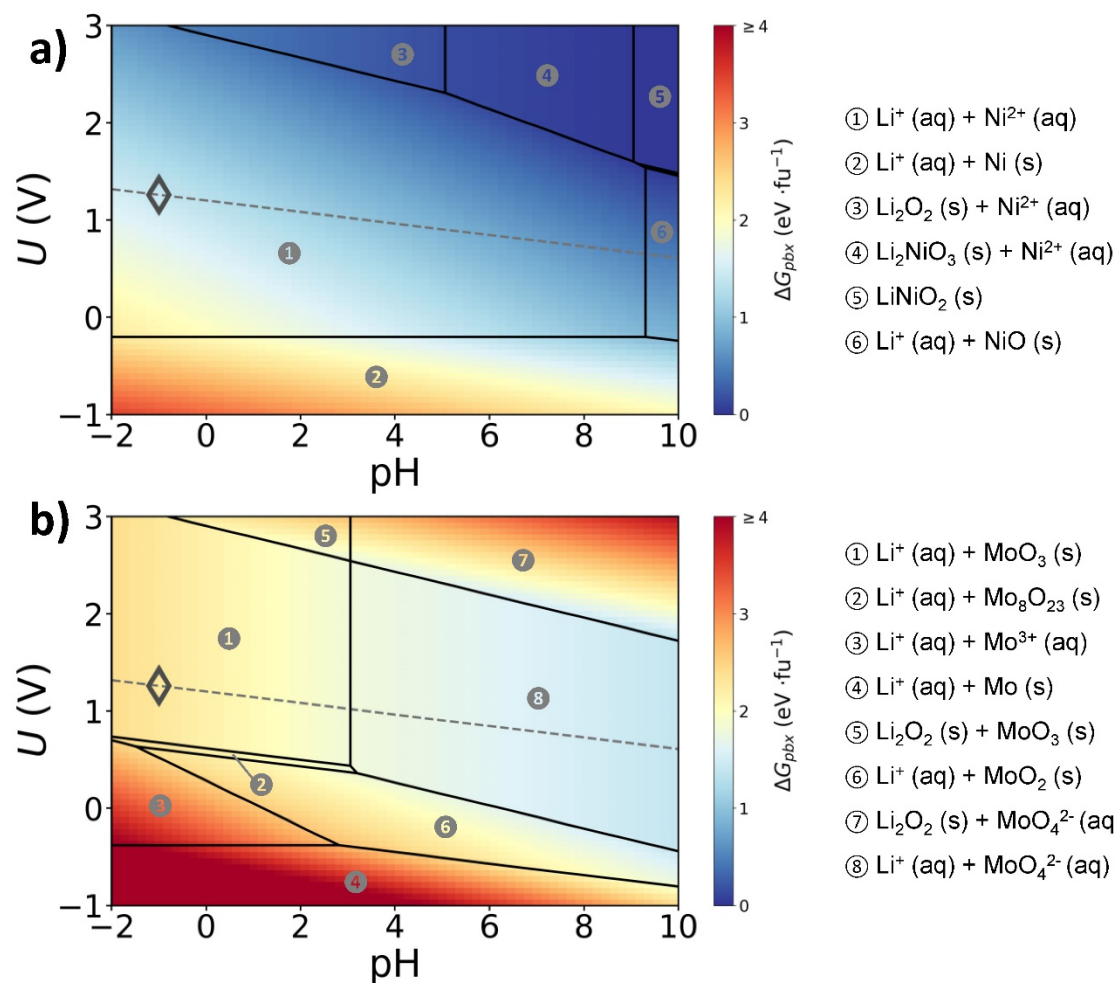

Figure S5. Stability of Ni<sup>3+</sup> and Mo<sup>6+</sup> in aqueous environment. Pourbaix Diagrams of (a) LiNiO<sub>2</sub> (Material ID: mp-25411) and (b) Li<sub>4</sub>MoO<sub>5</sub> (Material ID: mp-19117). Solid-aqueous equilibria and instability maps are calculated and plotted through Python Materials Genomics (pymatgen) packages.<sup>4-7</sup> Each aqueous ion concentration is 10<sup>-6</sup> M. Instability of the initial solid material is measured by  $\Delta G_{pbx}$ ,<sup>7</sup> normalized to the formula unit (LiNiO<sub>2</sub> and Li<sub>4</sub>MoO<sub>5</sub>, respectively). Gray dashed lines denote the O<sub>2</sub>/H<sub>2</sub>O equilibrium potential with trace O<sub>2</sub> approximated as 0.01 bar. Hollow gray diamonds indicate the pH and external potential (vs. SHE) exerted near the LiNiO<sub>2</sub> or Li<sub>4</sub>MoO<sub>5</sub> solid surface during the acid titration (10 M H<sub>2</sub>SO<sub>4</sub> with trace O<sub>2</sub>).

Figure S5 presents Pourbaix diagrams of LiNiO<sub>2</sub> and Li<sub>4</sub>MoO<sub>5</sub> (Material IDs: mp-25411 and mp-19117, respectively),<sup>6</sup> which are examined first to measure the instability of Ni<sup>3+</sup> and Mo<sup>6+</sup> in aqueous solutions. In a conventional Pourbaix diagram, each non-vertical line represents an electron-transfer-involving equilibrium potential (vs. SHE) between two groups of species neighboring the line, while each enclosed domain suggests thermodynamically the most stable states at given pH values and voltages applied externally. For example, solid LiNiO<sub>2</sub> is prone to form Li<sup>+</sup> (aq) and Ni<sup>2+</sup> (aq) when immersed in our acid titrant: 10 M H<sub>2</sub>SO<sub>4</sub> with trace O<sub>2</sub> (approximated as 0.01 bar), which corresponds to pH ≈ -1 and U ≈ 1.26 V (vs. SHE) of O<sub>2</sub>/H<sub>2</sub>O equilibrium potential exerted near the LiNiO<sub>2</sub> surface, as labelled by the dark grey hollow diamond in Figure S5a. The driving force for thermodynamically metastable LiNiO<sub>2</sub> to decompose into corresponding stable species can be measured by a relative free energy,  $\Delta G_{pbx}$ ,<sup>7</sup> as a function of pH and applied U, introduced recently in the corrosion community to complement the conventional Pourbaix diagram. The colormap in Figure S5a displays the quantities of  $\Delta G_{pbx}(\text{pH}, U)$  that are defined as the free energy (taking H<sup>+</sup>, H<sub>2</sub>O, and electrons into account) of the initial metastable material



(i.e.,  $\text{LiNiO}_2$ ) minus its decomposition products' free energy. Accordingly, the free energy change of the following reaction is  $-\Delta G_{pbx}$  by definition ( $\Delta G_{(S.6)} = -\Delta G_{pbx}$ ):

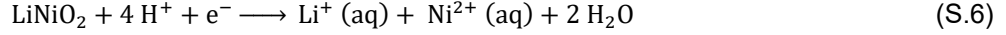

A redox couple, most probably  $\text{O}_2/\text{H}_2\text{O}$  in the acid titration environment, must exist to provide the electron for Equation (S.6). Here we posit that trace  $\text{O}_2$  reaches thermodynamic equilibrium (quasi-equilibrium) with  $\text{H}_2\text{O}$  ( $\Delta G_{(S.7)} \approx 0$ ):

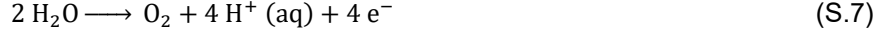

The net decomposition reaction, which must satisfy electroneutrality, combines Equation (S.6) with Equation (S.7) and the net thermodynamic driving force can be therefore determined ( $\Delta G_{(S.8)} = -4 \Delta G_{pbx} + \Delta G_{(S.7)}$ ):

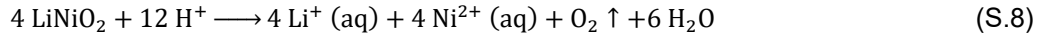

As the decomposition of  $\text{LiNiO}_2$  (Equation (S.8)) during the acid titration involves electron transfer, the driving force can also be interpreted as potential  $U_j$  through the following correlation, where  $\nu_j$  is the number of electrons transferred in reaction  $j$  and  $F$  is Faraday's constant:

$$\Delta G_j = -\nu_j F U_j \quad (\text{S.9})$$

As a multi-electron-transfer reaction is usually kinetically sluggish, a decomposition reaction (e.g., Equation (S.8)) requires adequate potential difference to proceed forward. With known  $\Delta G_{pbx}$  in Figure S5a and  $\nu_{(S.8)}$  for Equation (S.8), the driving force of water oxidation by  $\text{LiNiO}_2$  ( $\text{Ni}^{3+}$ ) can be measured by  $U_{(S.8)} = 1.38 \text{ V}$ , which is considered large enough to drive the reaction because we have experimentally observed  $\text{O}_2$  release when titrating pristine  $\text{LiNiO}_2$  powder.

On the other hand,  $\text{Li}^+ (\text{aq})$  and  $\text{MoO}_3$  are the predicted products when  $\text{Li}_4\text{MoO}_5$  is titrated by 10 M  $\text{H}_2\text{SO}_4$  (Figure S5b), which suggests that the decomposition of  $\text{Mo}^{6+}$ -containing oxide does not favor electron transfer and therefore does not warrant water oxidation (no necessity for Equation (S.7) to supply electrons). Despite limited solubility of solid  $\text{MoO}_3$ , we expect  $\text{Mo}^{6+}$ -containing species from NTMF decomposition in strong acid is totally dissolved, as we observed that the final solution after titrating pristine NTMF powder is entirely transparent without any precipitate.  $\text{MoO}_3$  has also been shown to be more soluble as the acid concentration increases<sup>8</sup> and its molar solubility ( $\sim 0.04 \text{ M}$ ) is reasonably higher than the  $\text{Mo}$  concentration ( $\sim 0.003 \text{ M}$ ) at the end of titration. As a result, analysis on solid-aqueous equilibria of the first two model metal-oxide materials predicts that during the acid titration,  $\text{Ni}^{3+}$  is prone to oxidize water and induce  $\text{O}_2$  release while  $\text{Mo}^{6+}$  is likely to dissolve without electron transfer, which agrees well with TiMS results (Table S3).

Even though high-valent Ni exists in both delithiated NTMF (DRX in this work) and delithiated Ni-Mn-Co layered oxides (NMC in our previous works<sup>9-11</sup>), no detectable water-oxidation  $\text{O}_2$  releases when titrating charged NMC electrodes. To compare their thermodynamic instability during the acid titration, we analyze the solid-aqueous equilibria of two model TM-oxides deriving from  $\text{LiNiO}_2$  (with 25% of Ni replaced by  $\text{Ti}^{4+}$  or  $\text{Mn}^{4+}$ ): 1)  $\text{LiNi}_{0.75}\text{Ti}_{0.25}\text{O}_2$  (Battery ID: mp-763760\_Li; Material ID: mp-756601); 2)  $\text{LiNi}_{0.75}\text{Mn}_{0.25}\text{O}_2$  (Battery ID: mp-1177345\_Li; Material ID: mp-1177345).<sup>6,12</sup> These two model oxides are selected in approximate analogy to different local lattice environments of  $\text{Ni}^{3+}$  in NTMF and NMC. Figure S6 shows Pourbaix diagrams and  $\Delta G_{pbx}$  maps of  $\text{LiNi}_{0.75}\text{Ti}_{0.25}\text{O}_2$  and  $\text{LiNi}_{0.75}\text{Mn}_{0.25}\text{O}_2$ , respectively. Through the same analysis procedures applied on  $\text{LiNiO}_2$ , the net thermodynamic driving force of decomposing oxides in conjunction with oxidizing water can be determined:

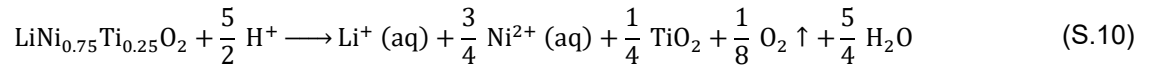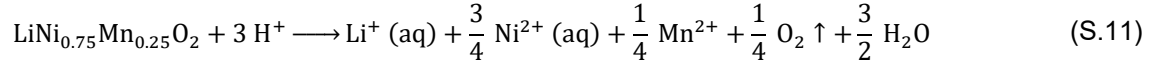

As the Equation S.11 involves more electrons transferred than Equation (S.10) ( $v_{(\text{S.11})} > v_{(\text{S.10})}$ ), the resulting decomposition driving force of Equation (S.11) in potential ( $U_{(\text{S.11})} = 1.17 \text{ V}$ ) is significantly smaller than  $U$  of Equation (S.10) ( $U_{(\text{S.10})} = 2.36 \text{ V}$ ). The difference may explain why water-oxidation  $\text{O}_2$  release does not take place at an observable rate for  $\text{Ni}^{3+}\text{-Mn}^{4+}\text{-O}$  materials (e.g., delithiated NMC), while  $\text{Ni}^{3+}\text{-Ti}^{4+}\text{-O}$  materials (e.g., delithiated NTMF) can efficiently oxidize water. The decomposition product  $\text{TiO}_2$  from NTMF is believed to form soluble titanyl sulfate ( $\text{TiOSO}_4 (\text{aq})$ )<sup>13,14</sup> in the concentrated  $\text{H}_2\text{SO}_4$ , because the final solution after titrating pristine NTMF powder is entirely transparent without any precipitate. The small decomposition driving force coupled with low solubility of  $\text{Mn}^{4+}$ -oxides may also be the cause of low leaching efficiency of each TM species (any of Ni, Mn, or Co) from NMC lattice into sulfuric acid solution (< 40% of each TM is dissolved after several days).<sup>15</sup>

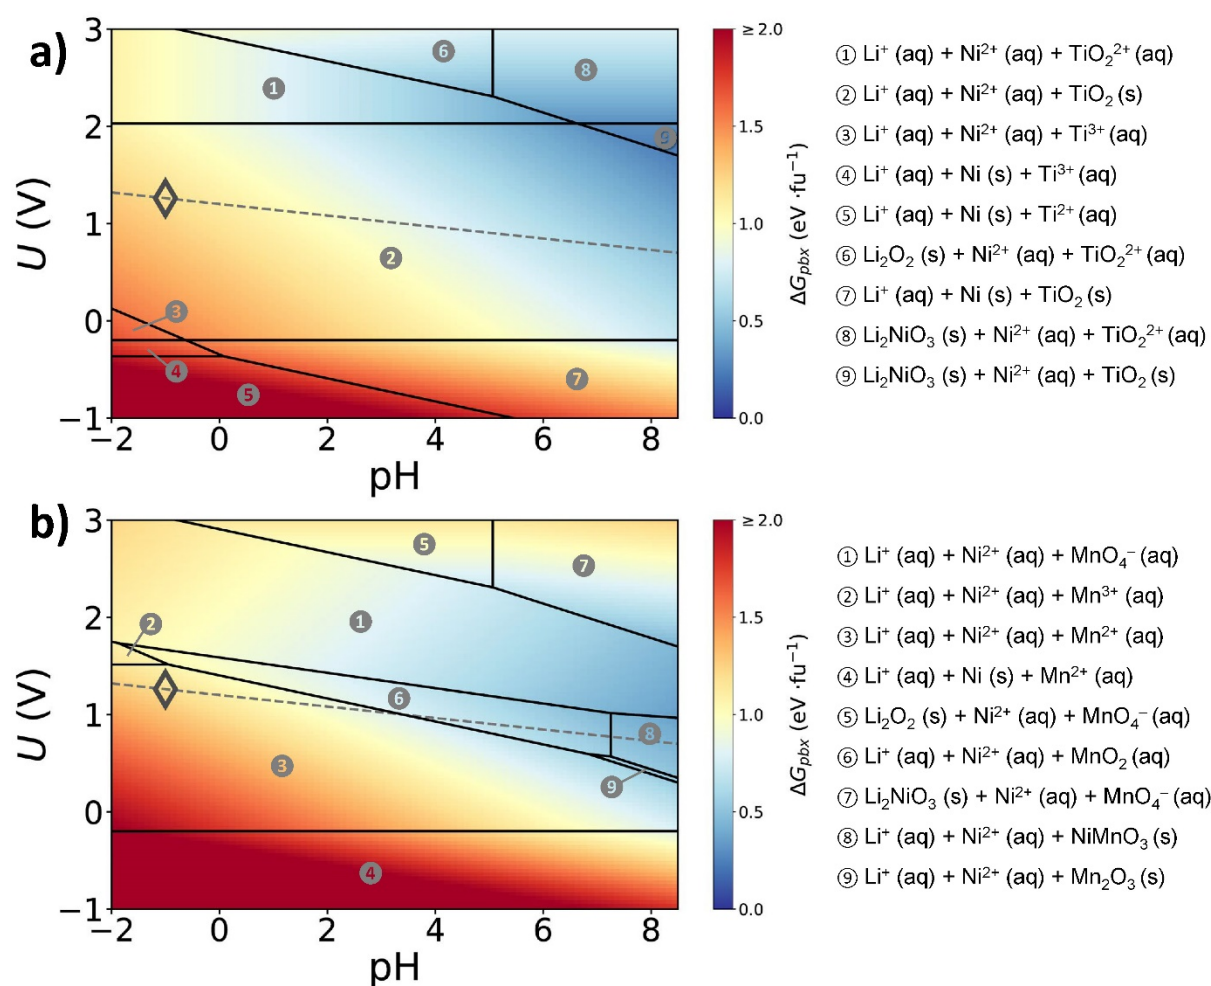

Figure S6. Water-oxidation driving force for Li-Ni<sup>2+/3+</sup>-O materials with different lattice transition-metal chemistries. Pourbaix Diagrams of (a) LiNi<sub>0.75</sub>Ti<sub>0.25</sub>O<sub>2</sub> (Material ID: mp-756601) and (b) LiNi<sub>0.75</sub>Mn<sub>0.25</sub>O<sub>2</sub> (Material ID: mp-1177345). Solid-aqueous equilibria and instability maps are calculated and plotted through Python Materials Genomics (pymatgen) packages.<sup>4-7</sup> Each aqueous ion concentration is 10<sup>-6</sup> M. Instability of the initial solid material is measured by  $\Delta G_{pbx}$ ,<sup>7</sup> normalized to the formula unit (LiNi<sub>0.75</sub>Ti<sub>0.25</sub>O<sub>2</sub> and LiNi<sub>0.75</sub>Mn<sub>0.25</sub>O<sub>2</sub>, respectively). Gray dashed lines denote the O<sub>2</sub>/H<sub>2</sub>O equilibrium potential with trace O<sub>2</sub> approximated as 0.01 bar. Hollow gray diamonds indicate the pH and external potential (vs. SHE) exerted near the LiNi<sub>0.75</sub>Ti<sub>0.25</sub>O<sub>2</sub> or LiNi<sub>0.75</sub>Mn<sub>0.25</sub>O<sub>2</sub> solid surface during the acid titration (10 M H<sub>2</sub>SO<sub>4</sub> with trace O<sub>2</sub>).

## References

- 1 B. D. McCloskey, D. S. Bethune, R. M. Shelby, G. Girishkumar and A. C. Luntz, *The Journal of Physical Chemistry Letters*, 2011, **2**, 1161–1166.
- 2 B. D. McCloskey, R. Scheffler, A. Speidel, G. Girishkumar and A. C. Luntz, *Journal of Physical Chemistry C*, 2012, **116**, 23897–23905.
- 3 M. Pourbaix, *Atlas of electrochemical equilibria in aqueous solutions.*, National Association of Corrosion Engineers, 2d English.
- 4 S. P. Ong, W. D. Richards, A. Jain, G. Hautier, M. Kocher, S. Cholia, D. Gunter, V. L. Chevrier, K. A. Persson and G. Ceder, *Computational Materials Science*, 2013, **68**, 314–319.
- 5 K. A. Persson, B. Waldwick, P. Lazic and G. Ceder, *Physical Review B - Condensed Matter and Materials Physics*, 2012, **85**, 235438.
- 6 A. Jain, S. P. Ong, G. Hautier, W. Chen, W. D. Richards, S. Dacek, S. Cholia, D. Gunter, D. Skinner, G. Ceder and K. A. Persson, *APL Materials*, 2013, **1**, 011002.
- 7 A. K. Singh, L. Zhou, A. Shinde, S. K. Suram, J. H. Montoya, D. Winston, J. M. Gregoire and K. A. Persson, *Chemistry of Materials*, 2017, **29**, 10159–10167.
- 8 L. M. Ferris, *Journal of Chemical & Engineering Data*, 1961, **6**, 600–603.
- 9 S. E. Renfrew and B. D. McCloskey, *ACS Applied Energy Materials*, 2019, **2**, 3762–3772.
- 10 S. E. Renfrew and B. D. McCloskey, *Journal of The Electrochemical Society*, 2019, **166**, A2762–A2768.
- 11 S. Ramakrishnan, B. Park, J. Wu, W. Yang and B. D. McCloskey, *Journal of the American Chemical Society*, 2020, **142**, 8522–8531.
- 12 F. Zhou, M. Cococcioni, C. A. Marianetti, D. Morgan and G. Ceder, *Physical Review B - Condensed Matter and Materials Physics*, 2004, **70**, 1–8.
- 13 H. Sibum, V. Güther, O. Roidl, F. Habashi, H. Uwe Wolf and C. Siemers, *Ullmann's Encyclopedia of Industrial Chemistry*, 2017, 1–35.
- 14 I. Szilágyi, E. Königsberger and P. M. May, *Inorganic Chemistry*, 2009, **48**, 2200–2204.
- 15 E. Billy, M. Joulié, R. Laucournet, A. Boulineau, E. de Vito and D. Meyer, *ACS Applied Materials and Interfaces*, 2018, **10**, 16424–16435.
